# Supplementary material for: Associations of sickness absence for pain in the low back, neck and shoulders with wider propensity to pain
Source: HighWire-hosted journal article supplement (doi:10.1136/oemed-2019-106193), 2020-02-20
Supplement: oemed-2019-106193supp001_data_supplement.pdf [file oemed-2019-106193supp001_data_supplement.pdf]

**Supplementary Table 1 Association of pain propensity index with sickness absence in month before follow-up attributed only to low back pain, according to report of low back pain in the 12 months before baseline**

| Risk factor                  | Low back pain in 12 months before baseline |     |                          | No low back pain in 12 months before baseline |     |                          |
|------------------------------|--------------------------------------------|-----|--------------------------|-----------------------------------------------|-----|--------------------------|
|                              | Sickness absence                           |     | <sup>a</sup> OR (95% CI) | Sickness absence                              |     | <sup>a</sup> OR (95% CI) |
|                              | No                                         | Yes |                          | No                                            | Yes |                          |
| <b>Pain propensity index</b> |                                            |     |                          |                                               |     |                          |
| 0                            | 753                                        | 37  | 1                        | 1,737                                         | 16  | 1                        |
| 1                            | 956                                        | 35  | 0.7 (0.5,1.2)            | 830                                           | 10  | 1.4 (0.6,3.2)            |
| 2                            | 836                                        | 29  | 0.6 (0.4,1.0)            | 565                                           | 13  | 2.5 (1.2,5.6)            |
| 3                            | 740                                        | 25  | 0.6 (0.4,1.1)            | 313                                           | 3   | 1.1 (0.3,4.0)            |
| 4                            | 483                                        | 24  | 0.8 (0.5,1.4)            | 136                                           | 2   | 1.5 (0.3,6.9)            |
| 5                            | 342                                        | 17  | 0.8 (0.4,1.4)            | 78                                            | 3   | 4.3 (1.1,16.6)           |
| ≥6                           | 364                                        | 20  | 0.7 (0.4,1.3)            | 38                                            | 1   | 2.6 (0.3,21.8)           |

<sup>a</sup>Odds ratios with 95% confidence intervals derived from a logistic regression model with adjustment for all of the risk factors listed in Table 3

**Supplementary Table 2 Association of pain propensity index with sickness absence in month before follow-up attributed only to neck pain, according to report of neck pain in the 12 months before baseline**

| Risk factor                  | Neck pain in 12 months before baseline |     |                 |           | No neck pain in 12 months before baseline |     |                 |            |
|------------------------------|----------------------------------------|-----|-----------------|-----------|-------------------------------------------|-----|-----------------|------------|
|                              | Sickness absence                       |     | <sup>a</sup> OR | (95% CI)  | Sickness absence                          |     | <sup>a</sup> OR | (95% CI)   |
|                              | No                                     | Yes |                 |           | No                                        | Yes |                 |            |
| <b>Pain propensity index</b> |                                        |     |                 |           |                                           |     |                 |            |
| 0                            | 400                                    | 3   | 1               |           | 1,743                                     | 10  | 1               |            |
| 1                            | 812                                    | 9   | 1.4             | (0.4,5.1) | 1,221                                     | 12  | 1.5             | (0.6,3.5)  |
| 2                            | 709                                    | 14  | 2.3             | (0.6,8.1) | 739                                       | 7   | 1.2             | (0.5,3.4)  |
| 3                            | 669                                    | 14  | 2.3             | (0.6,8.2) | 458                                       | 5   | 1.3             | (0.4,4.0)  |
| 4                            | 449                                    | 10  | 2.3             | (0.6,8.9) | 219                                       | 2   | 0.9             | (0.2,4.3)  |
| 5                            | 340                                    | 5   | 1.4             | (0.3,6.1) | 125                                       | 1   | 0.9             | (0.1,7.2)  |
| ≥6                           | 358                                    | 3   | 0.7             | (0.1,3.8) | 66                                        | 2   | 2.6             | (0.5,15.2) |

<sup>a</sup>Odds ratios with 95% confidence intervals derived from a logistic regression model with adjustment for all of the risk factors listed in Table 4

**Supplementary Table 3 Association of pain propensity index with sickness absence in month before follow-up attributed only to shoulder pain, according to report of shoulder pain in the 12 months before baseline**

| Risk factor                  | Shoulder pain in 12 months before baseline |     |                          | No shoulder pain in 12 months before baseline |     |                          |
|------------------------------|--------------------------------------------|-----|--------------------------|-----------------------------------------------|-----|--------------------------|
|                              | Sickness absence                           |     | <sup>a</sup> OR (95% CI) | Sickness absence                              |     | <sup>a</sup> OR (95% CI) |
|                              | No                                         | Yes |                          | No                                            | Yes |                          |
| <b>Pain propensity index</b> |                                            |     |                          |                                               |     |                          |
| 0                            | 202                                        | 1   | 1                        | 1,746                                         | 6   | 1                        |
| 1                            | 507                                        | 4   | 1.7 (0.2,16.1)           | 1,476                                         | 12  | 2.2 (0.8,6.0)            |
| 2                            | 643                                        | 6   | 2.3 (0.3,19.6)           | 1,144                                         | 5   | 1 (0.3,3.6)              |
| 3                            | 533                                        | 7   | 3.1 (0.4,27.0)           | 632                                           | 3   | 1.1 (0.3,4.6)            |
| 4                            | 417                                        | 2   | 1.1 (0.1,13.4)           | 332                                           | 2   | 1.4 (0.3,7.6)            |
| 5                            | 250                                        | 4   | 4.3 (0.4,41.8)           | 144                                           | 0   | - -                      |
| ≥6                           | 282                                        | 4   | 3.6 (0.4,36.7)           | 88                                            | 1   | 3.1 (0.3,28.5)           |

<sup>a</sup>Odds ratios with 95% confidence intervals derived from a logistic regression model with adjustment for all of the risk factors listed in Table 5

**Supplementary Table 4** Statistically significant baseline risk factors for sickness absence attributed to wrist/hand pain in month before follow-up

| Risk factor                                  | No sickness absence for low back pain | Absence attributed all or in part to low back pain |                 |           | Absence attributed only to low back pain |                 |           |
|----------------------------------------------|---------------------------------------|----------------------------------------------------|-----------------|-----------|------------------------------------------|-----------------|-----------|
|                                              |                                       | N                                                  | <sup>a</sup> OR | (95% CI)  | N                                        | <sup>a</sup> OR | (95% CI)  |
| Work for >50 hours per week                  | 1,928                                 | 12                                                 | 0.4             | (0.2,0.9) | 6                                        | 0.5             | (0.2,1.2) |
| <b>Adverse health beliefs about arm pain</b> |                                       |                                                    |                 |           |                                          |                 |           |
| Need to avoid physical activity              | 1,039                                 | 28                                                 | 1.9             | (1.2,3.0) | 6                                        | 1.0             | (0.4,2.3) |
| Poor prognosis                               | 862                                   | 26                                                 | 1.9             | (1.2,3.0) | 10                                       | 2.1             | (1.0,4.3) |
| <b>Pain propensity index</b>                 |                                       |                                                    |                 |           |                                          |                 |           |
| 0                                            | 1,897                                 | 16                                                 | 1               |           | 8                                        | 1               |           |
| 1                                            | 1,882                                 | 29                                                 | 1.6             | (0.9,3.1) | 11                                       | 1.3             | (0.5,3.3) |
| 2                                            | 1,758                                 | 22                                                 | 1.2             | (0.6,2.3) | 8                                        | 0.9             | (0.3,2.5) |
| 3                                            | 1,215                                 | 23                                                 | 1.5             | (0.8,3.0) | 6                                        | 0.9             | (0.3,2.8) |
| 4                                            | 866                                   | 20                                                 | 1.7             | (0.8,3.4) | 8                                        | 1.6             | (0.6,4.5) |
| 5                                            | 458                                   | 17                                                 | 2.4             | (1.1,5.0) | 4                                        | 1.5             | (0.4,5.2) |
| ≥6                                           | 387                                   | 20                                                 | 3.5             | (1.7,7.3) | 5                                        | 2.0             | (0.6,6.7) |

<sup>a</sup>Odds ratios with 95% confidence intervals derived from a single logistic regression model for each outcome that included all of the risk factors listed together with sex, mental health, number of distressing somatic symptoms in the past week, and time pressure at work. Risk estimates are presented only for factors that were significantly associated ( $p < 0.05$ ) with at least one of the two outcomes.
